# Supplementary material
Source: PubMed Central journal article supplement (PMC5337444)

1 **Online Repository Materials:**

|                                                                            | <b>Jones et al</b>                                                                                                                                     | <b>Varshney et al</b>                                                                                                                                  | <b>DEVIL</b>                |
|----------------------------------------------------------------------------|--------------------------------------------------------------------------------------------------------------------------------------------------------|--------------------------------------------------------------------------------------------------------------------------------------------------------|-----------------------------|
| <b>N</b>                                                                   | 36                                                                                                                                                     | 26                                                                                                                                                     | 49                          |
| <b>Age</b>                                                                 | 1-16 years                                                                                                                                             | 1-6 years                                                                                                                                              | 1-3 years                   |
| <b>Enrollment Criteria</b>                                                 | Reaction History<br>Peanut SPT $\geq 3$ mm<br>Peanut IgE $\geq 15$ kU/L<br>or Peanut IgE $\geq 7$ kU/L<br>if reaction within 6<br>months of enrollment | Reaction History<br>Peanut SPT $\geq 3$ mm<br>Peanut IgE $\geq 15$ kU/L<br>or Peanut IgE $\geq 7$ kU/L<br>if reaction within 6<br>months of enrollment | Positive entry<br>challenge |
| <b>Arms</b>                                                                | Open Label                                                                                                                                             | Active<br>Placebo<br>2:1                                                                                                                               | Low Dose<br>High Dose       |
| <b>Initial escalation:<br/>Initial &amp; Final Dose<br/>Peanut protein</b> | 0.1 mg to 50 mg                                                                                                                                        | 0.1 mg to 6 mg                                                                                                                                         | 0.1 mg to 6 mg              |
| <b>Starting Buildup<br/>Dose</b>                                           | 50 mg                                                                                                                                                  | 6 mg                                                                                                                                                   | 6 mg                        |
| <b>Dose Escalation<br/>Frequency</b>                                       | 2 weeks                                                                                                                                                | 2 weeks                                                                                                                                                | 2 weeks                     |
| <b>Maintenance Dose</b>                                                    | 300 - 4000 mg                                                                                                                                          | 4000 mg                                                                                                                                                | 300 or 3000 mg              |

2 **Table E1. Comparison of Three Pooled Trials**

3

4

5

6

7 **Figure E1: Histogram of Rates and Counts of AEs.** Subjects A, B, and C experienced the  
8 top three highest counts of AEs, while Subjects C, D, E experience the top three highest rates of  
9 AEs. Modeling the number of AEs based on the total count (left) captures the elevated rates of  
10 AEs experienced by individuals A, B, and C. Evaluating total counts, however, misses  
11 individuals D and E who experienced low numbers of AEs over a short period of time, leading to  
12 early dropout. By adjusting for the time on therapy, modeling the rate of AEs (right)  
13 appropriately captures the experience of those individuals like D and E whose symptoms led  
14 them to discontinue OIT.

15

16

17

18

| <b>Variable</b>                          | <b>Overall AEs</b>      |                | <b>Buildup AEs</b>      |                | <b>Maintenance AEs</b>  |                |
|------------------------------------------|-------------------------|----------------|-------------------------|----------------|-------------------------|----------------|
|                                          | <b>IRR<br/>(95% CI)</b> | <b>P-value</b> | <b>IRR<br/>(95% CI)</b> | <b>P-value</b> | <b>IRR<br/>(95% CI)</b> | <b>P-value</b> |
| <b>Sex (female compared to male)</b>     | 0.76<br>(0.44, 1.33)    | 0.34           | 0.71<br>(0.39, 1.29)    | 0.27           | 1.10<br>(0.52, 2.34)    | 0.80           |
| <b>Age (per year)</b>                    | 1.02<br>(0.92, 1.14)    | 0.66           | 1.05<br>(0.94, 1.18)    | 0.36           | 1.14<br>(1.00, 1.29)    | 0.047          |
| <b>Asthma</b>                            | 0.94<br>(0.56, 1.60)    | 0.83           | 0.91<br>(0.52, 1.59)    | 0.73           | 2.45<br>(1.08, 5.57)    | 0.03           |
| <b>Atopic Dermatitis</b>                 | 1.34<br>(0.69, 2.61)    | 0.39           | 1.17<br>(0.58, 2.36)    | 0.65           | 1.37<br>(0.54, 3.49)    | 0.51           |
| <b>Allergic Rhinitis</b>                 | 2.82<br>(1.63, 4.88)    | <0.001         | 2.15<br>(1.23, 3.76)    | 0.01           | 7.59<br>(2.82, 20.4)    | <0.001         |
| <b>Peanut SPT (per 5 mm)</b>             | 1.46<br>(1.16, 1.83)    | 0.001          | 1.42<br>(1.11, 1.80)    | 0.005          | 1.42<br>(1.02, 1.99)    | 0.04           |
| <b>Log Peanut IgE (per log increase)</b> | 0.91<br>(0.19, 4.34)    | 0.91           | 0.73<br>(0.16, 3.41)    | 0.69           | 8.23<br>(0.66, 102)     | 0.10           |

19

20 **Table E2: Unadjusted Incidence Rate Ratios (IRR) of the Influence of Baseline**  
21 **Characteristics on Rates of AEs Overall, during the Buildup\_Phase, and Maintenance**  
22 **Phase.**

23

24

25 **Online Repository Methods:**

26 *Study Designs and Subject Recruitment*

27 We compiled data from three OIT studies conducted at Duke University Medical Center  
28 (DUMC), University of North Carolina at Chapel Hill (UNC), and the University of Arkansas for  
29 Medical Sciences/Arkansas Children's Hospital (ACH). The underlying objective of all three  
30 studies was to demonstrate the efficacy of peanut OIT in achieving desensitization in peanut-  
31 allergic children and to determine if sustained unresponsiveness could be achieved. The Jones  
32 et al. study (NCT01891136, n=39) was an uncontrolled pilot study of peanut OIT (10, 11), while  
33 the Varshney et al. study (NCT00815035, n=28) was a randomized, placebo-controlled trial of  
34 peanut OIT, with an open label arm for all placebo subjects after 1 year (12). Both of these  
35 multicenter studies were conducted in collaboration between DUMC/UNC and ACH. From  
36 these two studies, only data from participants enrolled at DUMC/UNC were used in this  
37 analysis, and data collection spanned April 2004 to June 2013. Inclusion and exclusion criteria  
38 are as previously published. The third trial, the DEVIL study (NCT00932828, n=49), is an  
39 ongoing randomized single-center trial initially at DUMC and later at UNC, comparing a low and  
40 high maintenance dose of peanut OIT, in a younger age range of 9 months to 36 months.  
41 Inclusion and exclusion criteria were similar for this study with the exception of target age and  
42 the use of a positive entry oral food challenge (Table E1).

43 *OIT Protocol*

44 OIT administration consisted of gradually escalating doses of allergen, administered orally in a  
45 food vehicle every day over months, with the goal of desensitization. Protocols for the Jones et  
46 al and Varshney et al studies are as previously published, and the DEVIL study shares this  
47 protocol with changes as described in Table E1 (10, 12). While the trials varied in their study  
48 design (Table E1), they all share the same features in terms of dose escalation, comprising

49 three phases: initial escalation day, buildup with clinic visits every 2-3 weeks, and maintenance.  
50 Buildup lasted approximately 1 year, though this varied by subject. Doses were increased in  
51 this fashion until the goal maintenance dose was achieved, which ranged from 300-4000 mg of  
52 peanut protein depending on the study (Table E1). At this point, the maintenance phase began,  
53 in which the subject continued to take the maintenance dose on a daily basis for approximately  
54 3-4 years.

#### 55 *Safety Data Collection*

56 Safety data was collected in three different ways: records of symptoms occurring during dose  
57 escalation at the clinic, symptom diaries of home AEs and adverse event reports of home AEs.  
58 During dose escalation, research staff recorded the symptoms and timing of all reactions, as  
59 well as treatment administered. With home doses, parents recorded any symptoms typically  
60 associated with allergic reactions, such as rash, mouth itch, sneezing, coughing, vomiting, and  
61 diarrhea, in daily symptom diaries, along with the timing of the event and the treatment  
62 administered. Furthermore, parents were instructed to report all events whether perceived as  
63 related or unrelated to study coordinators, in order to capture all events potentially associated  
64 with therapy. These reported events were catalogued in an adverse event (AE) database (MS  
65 Access). All events were evaluated at the time of occurrence by study personnel for their  
66 possible relatedness to the therapy, based on the timing and characteristics of symptoms, and  
67 assigned one of 3 possible relationships to OIT: likely related, possibly related, or unrelated. All  
68 analyses primarily focus on events that were deemed likely related to therapy after subjects had  
69 tolerated the initial escalation day. We did not include any symptoms occurring during the food  
70 challenges that were part of the screening process or required for testing desensitization or  
71 sustained unresponsiveness.

#### 72 *Treatment of Reactions at Home*

73 The families of all study participants received extensive standard-of-care teaching in the  
74 recognition and treatment of allergic reactions and anaphylaxis. Subjects or their caregivers  
75 were instructed to administer antihistamines for any mild reactions (generally only affecting one  
76 body system) that developed within 2 hours of dosing. Reactions that involved more than one  
77 body system or were associated with systemic symptoms were considered to be moderate or  
78 severe, and subjects/caregivers were advised to administer epinephrine promptly and to call  
79 911 for emergency assistance. The study team ensured that all families had in-date  
80 epinephrine autoinjectors and food allergy action plans. A study physician was available by  
81 pager and phone at all times throughout the study, and parents were strongly encouraged to call  
82 with any questions about a given reaction.

### 83 *Statistical Methods*

84 We computed means, standard deviations, frequencies and proportions for all clinical history  
85 and immunological variables. Comparisons were made by t-tests or paired t-tests, and chi-  
86 square tests or Fisher's exact tests where appropriate. AE reports, symptom diary reports, and  
87 reactions during dose escalations were compiled for all subjects who received OIT, in order to  
88 generate counts and rates of likely-related events experienced by every individual during the  
89 buildup phase, during the maintenance phase, and in total. For all analyses (unless specified  
90 otherwise), home AEs and research unit AEs were grouped together to best represent the  
91 overall risk experienced by participants receiving OIT. Based on the descriptions and  
92 symptoms reported, we retrospectively sorted events into a variety of categories, and the  
93 multiple symptoms category was reserved for events that included more than one allergic  
94 symptom.

95 Some subjects from the Varshney et al. study were originally enrolled in a placebo arm and then  
96 transferred over to an open label section of this trial after one year. Events during these

97 placebo periods were not included, but events from the open label period were included in the  
98 analysis. Because the number of subjects who received placebo was limited both in sample  
99 size (8 of the original 111 subjects) and time on placebo (1 year for each subject), we did not  
100 formally compare the treatment group to the placebo group.

101 We assessed the baseline predictors of AE outcomes (sex; age at starting therapy, as a  
102 continuous variable; current and past history of asthma, atopic dermatitis, or allergic rhinitis;  
103 baseline peanut IgE, baseline peanut skin prick test (SPT)) using principal component analysis,  
104 finding no collinearity that would require removal of a particular variable. These variables were  
105 chosen based on their clinical relevance. We then fit a generalized linear model, assuming a  
106 Poisson distribution with scaled deviance, to determine the influence of the covariates listed  
107 above on the counts of AEs. These Poisson models were fit with and without adjusting for the  
108 other covariates. Because each individual may spend a different duration of time on therapy,  
109 we used the time on therapy on a log scale as an offset to adjust for this variable exposure to  
110 OIT. We then fit a similar Poisson model for AEs during the buildup period as well as AEs  
111 during the maintenance period to determine if there were any differences between the phases.  
112 Finally, we fit a Poisson model focusing solely on any AEs that involved gastrointestinal side  
113 effects, and another focusing on systemic reactions. From these models, we presented the  
114 incidence rate ratios for each of the variables, after adjusting for the other covariates in the  
115 model. For the covariates studied, missing data was limited. For one subject, baseline IgE was  
116 missing and this value was imputed with the 3 month IgE.

117 To assess seasonality of AEs between subjects with and without allergic rhinitis, we calculated  
118 the proportion of AEs occurring in each month. Chi-square test was used to determine if the  
119 counts of AEs by month were different between subjects with allergic rhinitis and those without.  
120 Relative risk ratio was calculated using rates of AEs during peak allergy months (April &  
121 September) compared to non-peak months (December).

122 To assess whether an event was indicative of a systemic reaction, we developed the following  
123 algorithm, based on the criteria for anaphylaxis established by the National Institute of Allergy  
124 and Infectious Diseases / Food Allergy and Anaphylaxis Network symposium (28). At the time  
125 that the AE was reported, each individual symptom was graded by the participants on a three  
126 point scale of mild (1), moderate (2), and severe (3). If an AE involved wheezing (mild,  
127 moderate, or severe), severe angioedema, whole body hives (severe), cough (moderate or  
128 severe), repeated vomiting (moderate or severe), or involved at least two body systems, then  
129 the event was labeled as a systemic reaction. For this analysis, we assumed that all systemic  
130 reactions should have been treated with epinephrine, and we compared this rate of predicted  
131 epinephrine use to the actual rate of epinephrine use.

132 Of note, reactions were also evaluated for their overall severity (based on the individual  
133 symptom severities assigned), and grouped into mild, moderate, and severe categories. Severe  
134 AEs were defined as involving hospitalization, ICU admission, or documented hypotension.

135 To assess parental patterns of epinephrine use, we identified five isolated symptoms that might  
136 trigger the use of epinephrine: moderate or severe coughing, wheezing of any severity, severe  
137 hives, and moderate or severe abdominal pain or vomiting. We then determined the proportion  
138 of times epinephrine was given in response to an event involving one of these symptoms.

139 All statistical analyses were performed with Stata/SE 13.1 (StataCorp LP, College Station, TX)  
140 and SAS 9.3 (SAS Institute, Cary NC).

141



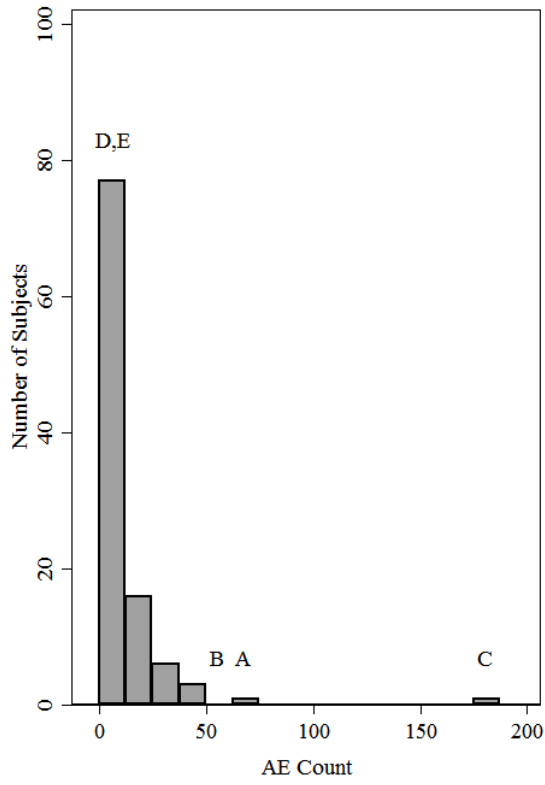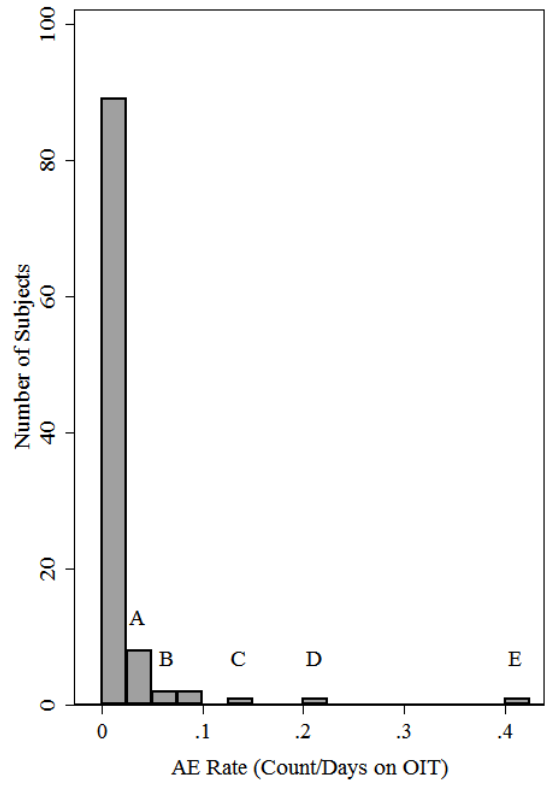

Supplement: NIHMS828879-supplement-supplement_1.pdf [file NIHMS828879-supplement-supplement_1.pdf]
